## Retraction

## Retraction of: Apigenin inhibits growth and migration of fibroblasts by suppressing FAK signaling

Hongyi Wang<sup>1,\*</sup>, Bingyu Guo<sup>1,\*</sup>, Shixiu Lin<sup>1</sup>, Peng Chang<sup>1</sup>, Kai Tao<sup>1</sup>

<sup>1</sup>Reconstructive and Plastic Surgery, General Hospital of North Theater, PLA, Shenyang, P.R. China

\*Equal contribution

Correspondence to: Kai Tao; email: [luzongzhengxing@sina.com](mailto:luzongzhengxing@sina.com)

Keywords: apigenin, hypertrophic scar, FAK, phosphorylation

Original article: *Aging (Albany NY)* 2019; 11: pp 3668–3678

PMID: [31170089](https://pubmed.ncbi.nlm.nih.gov/31170089/)

PMCID: [PMC6594802](https://pubmed.ncbi.nlm.nih.gov/PMC6594802/)

doi: [10.18632/aging.102006](https://doi.org/10.18632/aging.102006)

**This article has been retracted:** Aging has completed its investigation of this paper. We found multiple instances of image reuse and overlap with images from unrelated papers from different institutions. Specifically:

### Figure 1:

The transwell assay image in Figure 1G is a reuse of image in Figure 4G from the authors earlier paper [1];

The control transwell assay image in Figure 1H was reused in Figure 2G of the authors 2021 paper [2], which is already retracted;

The control transwell assay image in Figure 1H overlaps with an unrelated image in Figure 5D from already retracted paper [3];

The images in Figure 1H, 1I overlap with the images in Figure 5B from earlier published unrelated paper [4];

Also, images in Figure 1I overlap with the images in Figures 4A and 5B from already retracted paper [5];

Additionally, the images in Figure 1I were found in Figure 3F from concurrently published paper [6].

### Figure 4:

The transwell assay images in Figure 4A, 4B were found to overlap with images in Figure 4F of [1], Figure 4C of [4], Figure 4D of [5], and Figure 3C from [6].

The corresponding author informed us that these overlaps were due to improper data storage in the laboratory and has applied for a retraction. Given these findings, the Editorial decision was to retract the paper. All authors have agreed to this retraction.

## REFERENCES

1. Song Y, Guo B, Ma S, Chang P, Tao K. Naringin suppresses the growth and motility of hypertrophic scar fibroblasts by inhibiting the kinase activity of Akt. *Biomed Pharmacother.* 2018; 105:1291–8. <https://doi.org/10.1016/j.biopha.2018.06.103>  
PMID:[30021366](https://pubmed.ncbi.nlm.nih.gov/30021366/)
2. Xu Y, Guo B, Liu X, Tao K. miR-34a inhibits melanoma growth by targeting ZEB1. *Aging (Albany NY).* 2021; 13:15538–47. <https://doi.org/10.18632/aging.203114>  
PMID:[34102608](https://pubmed.ncbi.nlm.nih.gov/34102608/)  
Retraction in: *Aging (Albany NY).* 2024; 16:13432–3. <https://doi.org/10.18632/aging.206155>  
PMID:[39622559](https://pubmed.ncbi.nlm.nih.gov/39622559/)

3. Shan L, Liu W, Zhan Y. Sulfated polysaccharide of *Sepiella maindroni* ink targets Akt and overcomes resistance to the FGFR inhibitor AZD4547 in bladder cancer. *Aging (Albany NY)*. 2019; 11:7780–95.  
<https://doi.org/10.18632/aging.102286>  
PMID:[31545294](https://pubmed.ncbi.nlm.nih.gov/31545294/)  
Retraction in: *Aging (Albany NY)*. 2024; 16:12652–3. <https://doi.org/10.18632/aging.206104>  
PMID:[39348489](https://pubmed.ncbi.nlm.nih.gov/39348489/)
4. Jiashi W, Chuang Q, Zhenjun Z, Guangbin W, Bin L, Ming H. MicroRNA-506-3p inhibits osteosarcoma cell proliferation and metastasis by suppressing RAB3D expression. *Aging (Albany NY)*. 2018; 10:1294–305.  
<https://doi.org/10.18632/aging.101468>  
PMID:[29905536](https://pubmed.ncbi.nlm.nih.gov/29905536/)
5. He M, Shen P, Qiu C, Wang J. miR-627-3p inhibits osteosarcoma cell proliferation and metastasis by targeting PTN. *Aging (Albany NY)*. 2019; 11:5744–56.  
<https://doi.org/10.18632/aging.102157>  
PMID:[31413208](https://pubmed.ncbi.nlm.nih.gov/31413208/)  
Retraction in: *Aging (Albany NY)*. 2024; 16:12953–4. <https://doi.org/10.18632/aging.206128>  
PMID:[39405203](https://pubmed.ncbi.nlm.nih.gov/39405203/)
6. Chen J, Yan C, Yu H, Zhen S, Yuan Q. miR-548d-3p inhibits osteosarcoma by downregulating *KRAS*. *Aging (Albany NY)*. 2019; 11:5058–69.  
<https://doi.org/10.18632/aging.102097>  
PMID:[31327761](https://pubmed.ncbi.nlm.nih.gov/31327761/)
